# Supplementary material for: Picosecond time-resolved infrared study of 2-aminopurine ionisation in solution
Source: Royal Society of Chemistry journal article supplement (doi:10.1039/b705801b), 2007-05-24
Supplement: b705801b.pdf [file b705801b.pdf]

## **Picosecond Time-Resolved Infrared Study of 2-Aminopurine Ionisation in Solution**

Marina K. Kuimova,<sup>a,\*¶</sup> Peter M. W. Gill,<sup>a,c</sup> Ching-Yeh Lin,<sup>a,c</sup> Pavel Matousek,<sup>b</sup>  
Michael Towrie,<sup>b</sup> Xue Zhong Sun,<sup>a</sup> Michael W. George<sup>a</sup> and Anthony W. Parker<sup>b\*</sup>

z

<sup>a</sup> *School of Chemistry, University of Nottingham, University Park, Nottingham, UK  
NG7 2RD*

<sup>b</sup> *Central Laser Facility, CCLRC Rutherford Appleton Laboratory, Chilton, Didcot,  
Oxfordshire, UK OX11 0QX*

<sup>c</sup> *Research School of Chemistry, Australian National University, ACT 0200, Australia*

<sup>¶</sup> *Current address: Chemistry Department, Imperial College London, Exhibition Road,  
SW7 2AZ, UK;*

Emails

m.kuimova@imperial.ac.uk

a.w.parker@rl.ac.uk:

The DFT calculations for 7-H tautomer using Onsager model produce IR spectra significantly different from the gas phase and Langevin models. This is due to the change in the optimised geometry of 2AP. For 7-H tautomer within Onsager model the solvent forces 2AP to adopt a puckered conformation, while in all the other cases 2AP molecule remains flat.

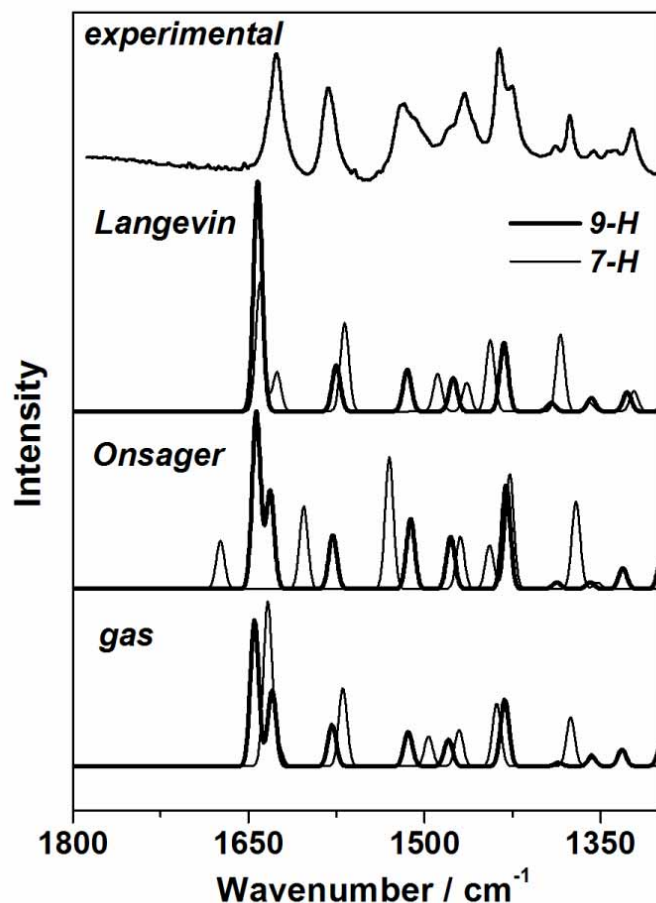

**Figure 1** Experimental FTIR spectrum of 2-aminopurine (2AP) in D<sub>2</sub>O solution at pD = 7 and IR spectra calculated for 7-H and 9-H tautomers of 2AP in the gas phase and in solution phase according to Onsager and Langevin models.

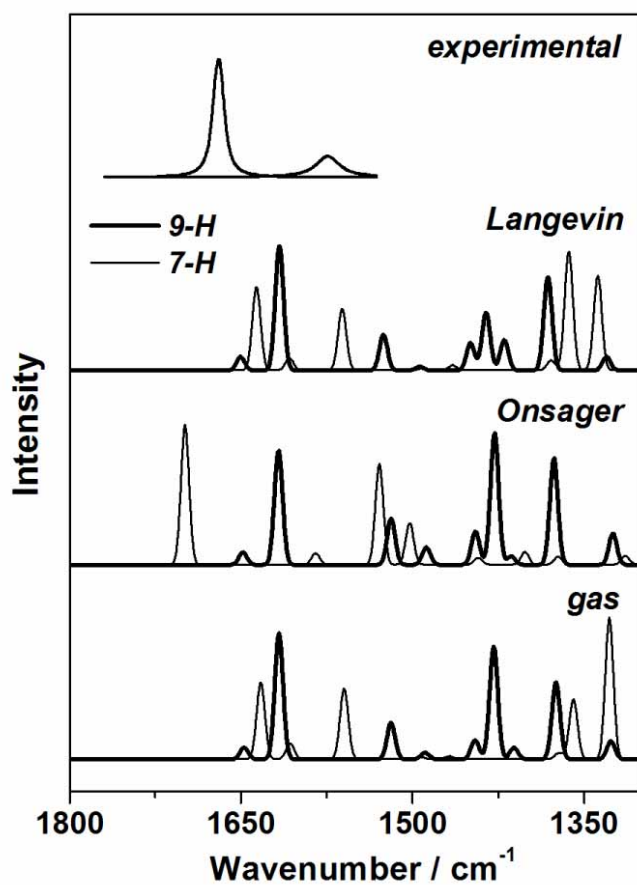

**Figure 2** Transient bands observed in ps-TRIR experiment following 267 nm excitation of 2-aminopurine (2AP) in D<sub>2</sub>O solution at pD = 2 and IR spectra calculated for 7-H and 9-H tautomers of 2-aminopurine radical cation, 2AP<sup>+</sup>, calculated in the gas phase and in solution phase according to Onsager and Langevin models.

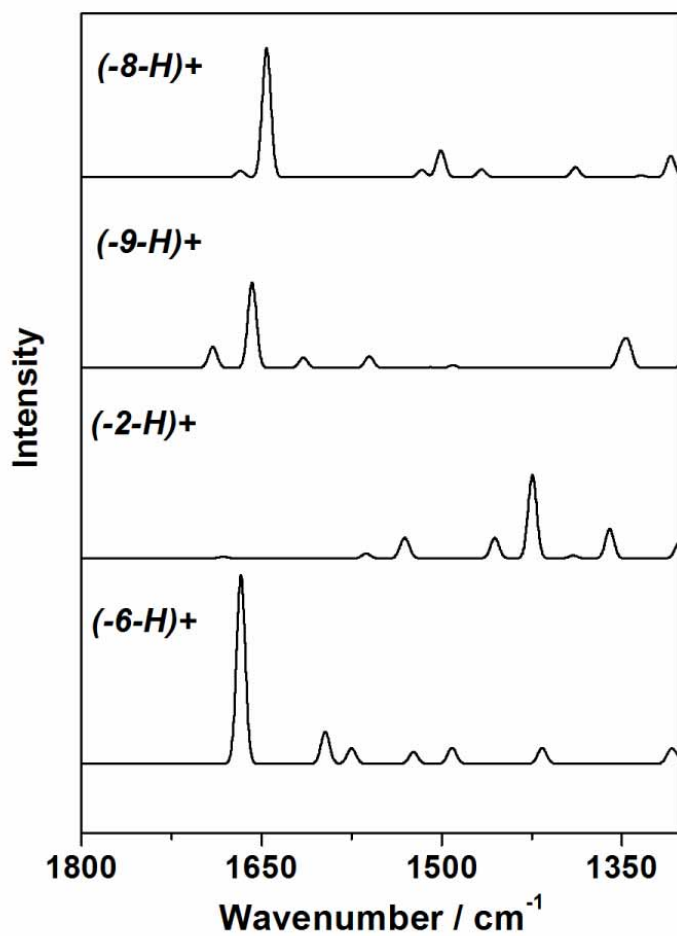

**Figure 3** IR spectra calculated using Langevin model for 2-aminopurine neutral radical, 2AP<sup>•</sup>(-H<sup>+</sup>), deprotonated from different sites.
